# Supplementary material
Source: PubMed Central journal article supplement (PMC7520446)
Supplement: BPH-177-4782-s001.pdf [file BPH-177-4782-s001.pdf]

# Extended Methods Form

Rice ASC, Cimino-Brown D, Eisenach JC, Kontinen VK, LaCroix-Fralish ML, Machin I, Mogil JS, Stöhr T. Animal models and the prediction of efficacy in clinical trials of analgesic drugs: a critical appraisal and call for uniform reporting standards. *Pain* 2008;139(2):241-5

## 1. Experimental design

|                               |                                                    |
|-------------------------------|----------------------------------------------------|
| Experiments blinded           | Yes                                                |
| - what                        | Drug Condition                                     |
| - how                         | Solutions randomly assigned a letter as only label |
| Randomization                 | Yes                                                |
| Power calculation             | No                                                 |
| How many data points removed? | >10                                                |
| - why                         | ROUT test with Q=0.1%                              |

## 2. Animals

|                                |                                    |
|--------------------------------|------------------------------------|
| Age                            | Young Adult                        |
| Sex                            | Male                               |
| Genetic background of mutation | C57BL/6J mice, Sprague Dawley rats |
| Supplier                       | Janvier                            |
| Weight Range                   | 20-30g (m), 150-200g (r)           |
| Behavioral Abnormalities       | None                               |

|                         |  |
|-------------------------|--|
| Any additional comments |  |
|-------------------------|--|

## 3. Environment

### a. Housing

|                                                          |                            |
|----------------------------------------------------------|----------------------------|
| Diet                                                     | SAFE-A04 pellets           |
| Bedding                                                  | Standard Rodent Bedding    |
| Cage rack ventilation                                    | Not ventilated (std. cage) |
| Home cage enrichment                                     | Nestlets                   |
| Habituation time before experiments (in days)            | >7 days                    |
| Handling frequency before testing                        | Daily                      |
| Cage cleaning frequency                                  | Once per week              |
| # housed per cage                                        | 6+                         |
| House experimental/control groups together or separately | Same cage                  |
| Different species housed in same room                    | No                         |
| Lights on time                                           | 7:00                       |
| Lights off time                                          | 19:00                      |
| Procedural anesthetic                                    | Inj. Ketamine/Xylazine     |
| Post-operative analgesia                                 | No                         |
| -Analgesic and dose                                      |                            |

### b. Testing

|                                              |                    |
|----------------------------------------------|--------------------|
| # of testers                                 | 2                  |
| Experience of tester(s)                      | 4-8 years          |
| Lighting intensity (lux)                     | 350-450            |
| Time testing ends                            | 17:00              |
| Test environment noise                       | Quiet              |
| Recent calibration of testing equipment      | Yes                |
| Cleaning of test equip. between subjects     | Yes                |
| -with                                        | Commercial cleaner |
| Habituation time before testing (in minutes) | >60 minutes        |
| Oestrus stage of females                     | Unknown            |
| Number of animals present in testing room    | 16                 |
| Distance separated                           |                    |
| In visual contact                            | No                 |
| Arousal state                                | Alert only         |
