# Supplementary material
Source: PubMed Central journal article supplement (PMC7520446)
Supplement: BPH-177-4782-s003.pdf [file BPH-177-4782-s003.pdf]

## Data analysis summary

| Figure   | Description                                                                                        | n number                                                                                                                                                                                                                                                                       | Outliers (data points) | Passed normality test ? | Test                                           | F                                                  | p                                                        | Post-hoc test | versus  |
|----------|----------------------------------------------------------------------------------------------------|--------------------------------------------------------------------------------------------------------------------------------------------------------------------------------------------------------------------------------------------------------------------------------|------------------------|-------------------------|------------------------------------------------|----------------------------------------------------|----------------------------------------------------------|---------------|---------|
| 1a       | RNE28 dose-effect in HEK-293 cells                                                                 | 6 TREK-1 at 0.1 µM<br>6 TREK-1 at 1 µM<br>5 TREK-1 at 10 µM<br>6 TREK-1 at 20 µM<br>7 TREK-1 at 50 µM<br>7 TREK-1 at 100 µM<br>5 TREK-1 at 200 µM<br>10 TREK-2 at 100 µM<br>6 TRAAK at 100 µM                                                                                  | 0 (58)                 | N/A                     | N/A                                            | N/A                                                | N/A                                                      | N/A           | N/A     |
| 1b left  | Analgesia induced by RNE28 in naive mice - time-course                                             | 5 vehicle p.o.<br>8 RNE28 15 mg/kg p.o.                                                                                                                                                                                                                                        | 2 (140)                | N/A                     | two-way ANOVA                                  | Interaction 4.133<br>Time 8.888<br>Treatment 29.76 | Interaction <0.0001<br>Time <0.0001<br>Treatment <0.0001 | Dunnett's     | Vehicle |
| 1b right | Analgesia induced by RNE28 in naive mice - AUC                                                     | 7 RNE28 30 mg/kg p.o.<br>8 RNE28 60 mg/kg p.o.                                                                                                                                                                                                                                 | 0 (28)                 | no                      | Kruskal-Wallis                                 | N/A                                                | 0.0002                                                   | Dunn's        | Vehicle |
| 1c left  | Analgesia induced by RNE28 in carrageena-injected mice - time-course                               | 5 vehicle p.o.<br>7 RNE28 15 mg/kg p.o.                                                                                                                                                                                                                                        | 0 (135)                | N/A                     | two-way ANOVA                                  | Interaction 6.685<br>Time 18.52<br>Treatment 40.93 | Interaction <0.0001<br>Time <0.0001<br>Treatment <0.0001 | Dunnett's     | Vehicle |
| 1c right | Analgesia induced by RNE28 in carrageena-injected mice - AUC                                       | 7 RNE28 30 mg/kg p.o.<br>8 RNE28 60 mg/kg p.o.                                                                                                                                                                                                                                 | 0 (27)                 | no                      | Kruskal-Wallis                                 | N/A                                                | 0.0002                                                   | Dunn's        | Vehicle |
| 1d       | RNE28 dose effect curves in naive and carrageenan-injected mice                                    | 5 vehicle p.o. - naive<br>5 vehicle p.o. - carrageenan<br>8 RNE28 15 mg/kg p.o. - naive<br>7 RNE28 15 mg/kg p.o. - carrageenan<br>7 RNE28 30 mg/kg p.o. - naive<br>7 RNE28 30 mg/kg p.o. - carrageenan<br>8 RNE28 60 mg/kg p.o. - naive<br>8 RNE28 60 mg/kg p.o. - carrageenan | 0 (55)                 | N/A                     | Comparison of fits: extra sum-of-square F test | 3.166                                              | 0.0220                                                   | N/A           | N/A     |
|          |                                                                                                    |                                                                                                                                                                                                                                                                                |                        |                         | two-way ANOVA                                  | Interaction 1.211<br>Model 7.314<br>Dose 25.25     | Interaction 0.3161<br>Model 0.0095<br>Dose <0.0001       | Sidak's       | Naive   |
| 2a left  | Analgesic effect of RNE28 on mechanical pain in a mouse model of post-operative pain - Time-course | 10 vehicle p.o.<br>10 morphine 3 mg/kg p.o.                                                                                                                                                                                                                                    | 2 (240)                | N/A                     | two-way ANOVA                                  | Interaction 2.132<br>Time 25.82<br>Treatment 10.45 | Interaction 0.0096<br>Time <0.0001<br>Treatment <0.0001  | Dunnett's     | Vehicle |

| Figure   | Description                                                                                     | n number                                                                                            | Outliers (data points) | Passed normality test ? | Test           | F                                                   | p                                                        | Post-hoc test | versus  |
|----------|-------------------------------------------------------------------------------------------------|-----------------------------------------------------------------------------------------------------|------------------------|-------------------------|----------------|-----------------------------------------------------|----------------------------------------------------------|---------------|---------|
| 2a right | Analgesic effect of RNE28 on mechanical pain in a mouse model of post-operative pain - AUC      | 10 RNE28 15 mg/kg p.o.<br>10 RNE28 30 mg/kg p.o.                                                    | 0 (40)                 | yes                     | one-way ANOVA  | 8.185                                               | 0.0003                                                   | Dunnett's     | Vehicle |
| 2b left  | Analgesic effect of RNE28 on thermal pain in a mouse model of post-operative pain - Time-course | 8 vehicle p.o.<br>8 morphine 3 mg/kg p.o.<br>8 RNE28 15 mg/kg p.o.<br>8 RNE28 30 mg/kg p.o.         | 1 (224)                | N/A                     | two-way ANOVA  | Interaction 2.769<br>Time 22.50<br>Treatment 25.99  | Interaction 0.0003<br>Time <0.0001<br>Treatment <0.0001  | Dunnett's     | Vehicle |
| 2b right | Analgesic effect of RNE28 on thermal pain in a mouse model of post-operative pain - AUC         |                                                                                                     | 0 (32)                 | yes                     | one-way ANOVA  | 2.953                                               | 0.0497                                                   | Dunnett's     | Vehicle |
| 2c left  | Analgesic effect of RNE28 on mechanical pain in a rat model of inflammatory pain - Time-course  | 8 vehicle p.o.<br>8 morphine 5 mg/kg p.o.<br>8 RNE28 100 mg/kg p.o.<br>8 RNE28 200 mg/kg p.o.       | 1 (256)                | N/A                     | two-way ANOVA  | Interaction 7.529<br>Time 126.9<br>Treatment 89.29  | Interaction <0.0001<br>Time <0.0001<br>Treatment <0.0001 | Dunnett's     | Vehicle |
| 2c right | Analgesic effect of RNE28 on mechanical pain in a rat model of inflammatory pain - AUC          |                                                                                                     | 0 (32)                 | yes                     | one-way ANOVA  | 17.89                                               | <0.0001                                                  | Dunnett's     | Vehicle |
| 2d left  | Analgesic effect of RNE28 on mechanical pain in a rat model of neuropathic pain - Time-course   | 7 vehicle p.o.<br>9 gabapentin 100 mg/kg p.o.<br>10 RNE28 100 mg/kg p.o.<br>10 RNE28 200 mg/kg p.o. | 4 (288)                | N/A                     | two-way ANOVA  | Interaction 0.9037<br>Time 64.92<br>Treatment 9.897 | Interaction 0.5866<br>Time <0.0001<br>Treatment <0.0001  | Dunnett's     | Vehicle |
| 2d right | Analgesic effect of RNE28 on mechanical pain in a rat model of neuropathic pain - AUC           |                                                                                                     | 0 (36)                 | no                      | Kruskal-Wallis | N/A                                                 | 0.0215                                                   | Dunn's        | Vehicle |
| 3a left  | Analgesia induced by RNE28 in WT and TREK-1 <sup>-/-</sup> mice - time course                   | 9 WT<br>8 TREK-1 <sup>-/-</sup>                                                                     | 1 (85)                 | N/A                     | two-way ANOVA  | Interaction 2.649<br>Time 5.844<br>Genotype 13.20   | Interaction 0.0399<br>Time 0.0004<br>Genotype 0.0005     | Sidak's       | WT      |

| Figure   | Description                                                                                                       | n number                                                                                                                                                                    | Outliers (data points) | Passed normality test ? | Test                                  | F                                                  | p                                                        | Post-hoc test | versus          |
|----------|-------------------------------------------------------------------------------------------------------------------|-----------------------------------------------------------------------------------------------------------------------------------------------------------------------------|------------------------|-------------------------|---------------------------------------|----------------------------------------------------|----------------------------------------------------------|---------------|-----------------|
| 3a right | Analgesia induced by RNE28 in WT and TREK-1 <sup>-/-</sup> mice - AUC                                             | 9 WT<br>8 TREK-1 <sup>-/-</sup>                                                                                                                                             | 0 (17)                 | yes                     | unpaired two-tailed t-test            | 4.2                                                | 0.0294                                                   | N/A           | N/A             |
| 3b left  | Administration of subcutaneous morphine together with subcutaneous spadine in naive mice - time course            | 6 Morphine 3 mg/kg + Vehicle s.c.<br>9 Morphine 3 mg/kg + Spadine 0.1 mg/kg s.c.<br>9 Morphine 3 mg/kg + Spadine 1 mg/kg s.c.<br>6 Morphine 3 mg/kg + Spadine 10 mg/kg s.c. | 0 (180)                | N/A                     | two-way ANOVA                         | Interaction 4.478<br>Time 15.06<br>Treatment 43.26 | Interaction <0.0001<br>Time <0.0001<br>Treatment <0.0001 | Sidak's       | Vehicle         |
| 3b right | Administration of subcutaneous morphine together with subcutaneous spadine in naive mice - AUC                    | 6 Morphine 3 mg/kg + Vehicle s.c.<br>9 Morphine 3 mg/kg + Spadine 0.1 mg/kg s.c.<br>9 Morphine 3 mg/kg + Spadine 1 mg/kg s.c.<br>6 Morphine 3 mg/kg + Spadine 10 mg/kg s.c. | 0 (30)                 | no                      | Kruskal-Wallis                        | N/A                                                | 0.0002                                                   | Dunn's        | Vehicle         |
| 3c left  | Administration of intraperitoneal RNE28 together with subcutaneous spadine in naive mice - time course            | 9 RNE28 30 mg/kg i.p. + Vehicle s.c.<br>10 RNE28 30 mg/kg i.p. + Spadine 1 mg/kg s.c.                                                                                       | 1 (95)                 | N/A                     | two-way ANOVA                         | Interaction 3.704<br>Time 21.51<br>Treatment 36.42 | Interaction 0.0040<br>Time <0.0001<br>Treatment <0.0001  | Sidak's       | RNE28 + Vehicle |
| 3c right | Administration of intraperitoneal RNE28 together with subcutaneous spadine in naive mice - AUC                    | 9 RNE28 30 mg/kg i.p. + Vehicle s.c.<br>10 RNE28 30 mg/kg i.p. + Spadine 1 mg/kg s.c.                                                                                       | 0 (19)                 | yes                     | unpaired two-tailed t-test            | 2.925                                              | 0.0003                                                   | N/A           | N/A             |
| 3d left  | Administration of intraperitoneal RNE28 together with intrathecal spadine in naive mice - time course             | 10 RNE28 30 mg/kg i.p. + Vehicle i.t.<br>10 RNE28 30 mg/kg i.p. + Spadine 5 pmol i.t.                                                                                       | 0 (100)                | N/A                     | two-way ANOVA                         | Interaction 9.486<br>Time 17.95<br>Treatment 54.34 | Interaction <0.0001<br>Time <0.0001<br>Treatment <0.0001 | Sidak's       | RNE28 + Vehicle |
| 3d right | Administration of intraperitoneal RNE28 together with intrathecal spadine in naive mice - AUC                     | 10 RNE28 30 mg/kg i.p. + Vehicle i.t.<br>10 RNE28 30 mg/kg i.p. + Spadine 5 pmol i.t.                                                                                       | 0 (20)                 | yes                     | unpaired two-tailed t-test            | 1.878                                              | <0.0001                                                  | N/A           | N/A             |
| 3e left  | Administration of intraperitoneal RNE28 together with intracerebroventricular spadine in naive mice - time course | 9 RNE28 30 mg/kg i.p. + Vehicle i.c.v.<br>10 RNE28 30 mg/kg i.p. + Spadine 2 pmol i.c.v.                                                                                    | 0 (95)                 | N/A                     | two-way ANOVA                         | Interaction 2.526<br>Time 20.13<br>Treatment 28.76 | Interaction 0.0341<br>Time <0.0001<br>Treatment <0.0001  | Sidak's       | RNE28 + Vehicle |
| 3e right | Administration of intraperitoneal RNE28 together with intracerebroventricular spadine in naive mice - AUC         | 9 RNE28 30 mg/kg i.p. + Vehicle i.c.v.<br>10 RNE28 30 mg/kg i.p. + Spadine 2 pmol i.c.v.                                                                                    | 0 (19)                 | no                      | unpaired two-tailed Mann-Whitney test | N/A                                                | 0.0044                                                   | N/A           | N/A             |
| 3f left  | Administration of intraperitoneal RNE28 together with intraplantar spadine in naive mice - time course            | 9 RNE28 30 mg/kg i.p. + Vehicle i.pl.<br>10 RNE28 30 mg/kg i.p. + Spadine 20 pmol i.pl.                                                                                     | 1 (95)                 | N/A                     | two-way ANOVA                         | Interaction 3.450<br>Time 15.71<br>Treatment 8.803 | Interaction 0.0064<br>Time <0.0001<br>Treatment 0.0038   | Sidak's       | RNE28 + Vehicle |

| Figure   | Description                                                                                    | n number                                                                                                                        | Outliers (data points) | Passed normality test ? | Test                                  | F                                                       | p                                                           | Post-hoc test | versus   |
|----------|------------------------------------------------------------------------------------------------|---------------------------------------------------------------------------------------------------------------------------------|------------------------|-------------------------|---------------------------------------|---------------------------------------------------------|-------------------------------------------------------------|---------------|----------|
| 3f right | Administration of intraperitoneal RNE28 together with intraplantar spadine in naive mice - AUC | 9 RNE28 30 mg/kg i.p. + Vehicle i.pl.<br>10 RNE28 30 mg/kg i.p. + Spadine 20 pmol i.pl.                                         | 1 (19)                 | no                      | unpaired two-tailed Mann-Whitney test | N/A                                                     | 0.0028                                                      | N/A           | N/A      |
| 3g       | Forced swimming test in RNE28-treated naive mice                                               | 9 vehicle p.o.<br>9 duloxetine 10 mg/kg i.p.<br>9 RNE29 15 mg/kg p.o.<br>9 RNE29 30 mg/kg p.o.<br>9 RNE29 60 mg/kg p.o.         | 0 (45)                 | yes                     | one-way ANOVA                         | 19.54                                                   | <0.0001                                                     | Dunnett's     | Vehicle  |
| 3h       | Tail suspension test in RNE28-treated naive mice                                               | 8 vehicle p.o.<br>8 duloxetine 10 mg/kg i.p.<br>8 RNE28 15 mg/kg p.o.<br>8 RNE28 30 mg/kg p.o.<br>8 RNE28 60 mg/kg p.o.         | 0 (40)                 | no                      | Kruskal-Wallis                        | N/A                                                     | 0.0002                                                      | Dunn's        | Vehicle  |
| 4b       | Changes in current density at 60 mV induced by RNE28 on TREK1/TRAAK chimeras                   | 13 TREK-1 ; 6 TRAAK ; 11 Chimera 1 ;<br>7 Chimera 2 ; 10 Chimera 3 ; 20 Chimera 4 ;<br>6 Chimera 5 ; 14 Chimera 6 ; 8 Chimera 7 | 0 (190)                | N/A                     | two-way ANOVA                         | Interaction 3.652<br>Construct 3.652<br>Perfusion 27.65 | Interaction 0.0006<br>Construct 0.0006<br>Perfusion <0.0001 | Sidak's       | Baseline |
| 4c       | TREK-1 baseline vs RNE28 I/V curve                                                             | 13 TREK-1                                                                                                                       | 0 (856)                | N/A                     | two-way ANOVA                         | Interaction 10.87<br>Voltage 42.96<br>Perfusion 353.4   | Interaction <0.0001<br>Voltage <0.0001<br>Perfusion <0.0001 | Sidak's       | Baseline |
| 4d       | TRAAK baseline vs RNE28 I/V curve                                                              | 6 TRAAK                                                                                                                         | 0 (396)                | N/A                     | two-way ANOVA                         | Interaction 0.3631<br>Voltage 45.34<br>Perfusion 5.406  | Interaction 0.9995<br>Voltage <0.0001<br>Perfusion 0.0207   | Sidak's       | Baseline |
| 4e       | Chimera 4 baseline vs RNE28 I/V curve                                                          | 20 chimera 4                                                                                                                    | 6 (1320)               | N/A                     | two-way ANOVA                         | Interaction 3.819<br>Voltage 49.65<br>Perfusion 150.4   | Interaction <0.0001<br>Voltage <0.0001<br>Perfusion <0.0001 | Sidak's       | Baseline |
| 4f       | Chimera 6 baseline vs RNE28 I/V curve                                                          | 14 chimera 6                                                                                                                    | 4 (924)                | N/A                     | two-way ANOVA                         | Interaction 8.194<br>Voltage 54.65<br>Perfusion 257.7   | Interaction <0.0001<br>Voltage <0.0001<br>Perfusion <0.0001 | Sidak's       | Baseline |
| 5a       | Intestinal transit (bead expulsion) in RNE28-treated naive mice                                | 6 vehicle p.o.<br>6 morphine 3 mg/kg p.o.<br>6 RNE28 15 mg/kg p.o.<br>5 RNE28 30 mg/kg p.o.<br>6 RNE28 60 mg/kg p.o.            | 0 (29)                 | no                      | Kruskal-Wallis                        | N/A                                                     | 0.0184                                                      | Dunn's        | Vehicle  |
| 5b       | Gastrointestinal transit (methylene blue gavage) in RNE28-treated naive mice                   | 9 vehicle p.o.<br>9 morphine 3 mg/kg p.o.<br>9 RNE28 15 mg/kg p.o.<br>9 RNE28 30 mg/kg p.o.<br>8 RNE28 60 mg/kg p.o.            | 0 (44)                 | yes                     | one-way ANOVA                         | 10.46                                                   | <0.0001                                                     | Dunnett's     | Vehicle  |

| Figure     | Description                                                                  | n number                                                                                                                  | Outliers (data points) | Passed normality test ? | Test                                           | F                                                   | p                                                       | Post-hoc test | versus            |
|------------|------------------------------------------------------------------------------|---------------------------------------------------------------------------------------------------------------------------|------------------------|-------------------------|------------------------------------------------|-----------------------------------------------------|---------------------------------------------------------|---------------|-------------------|
| 5c         | Sedation (infrared actimeter) in RNE28-treated naive mice                    | 9 vehicle p.o.<br>10 RNE28 15 mg/kg p.o.<br>10 RNE28 30 mg/kg p.o.<br>10 RNE28 60 mg/kg p.o.                              | 0 (39)                 | no                      | Kruskal-Wallis                                 | N/A                                                 | 0.1816                                                  | Dunn's        | Vehicle           |
| 5d         | Sedation (rotarod) in RNE28-treated naive mice                               | 9 vehicle p.o.<br>10 RNE28 15 mg/kg p.o.<br>10 RNE28 30 mg/kg p.o.<br>10 RNE28 60 mg/kg p.o.                              | 0 (39)                 | yes                     | one-way ANOVA                                  | 2.275                                               | 0.0970                                                  | Dunnett's     | Vehicle           |
| 5e         | Respiratory rate of RNE28-treated naive mice                                 | 6 vehicle p.o.<br>6 morphine 50 mg/kg p.o.<br>6 RNE28 15 mg/kg p.o.<br>6 RNE28 30 mg/kg p.o.<br>6 RNE28 60 mg/kg p.o.     | 0 (180)                | N/A                     | two-way ANOVA                                  | Interaction 0.7013<br>Time 7.836<br>Treatment 14.35 | Interaction 0.8204<br>Time <0.0001<br>Treatment <0.0001 | Dunnett's     | Vehicle           |
| 5f         | Conditioned place preference test with chronic RNE28 treatment in naive mice | 12 vehicle p.o.<br>9 morphine 15 mg/kg p.o.<br>12 RNE28 15 mg/kg p.o.<br>12 RNE28 30 mg/kg p.o.<br>12 RNE28 60 mg/kg p.o. | 0 (57)                 | yes                     | one-way ANOVA                                  | 5.63                                                | 0.0008                                                  | Dunnett's     | Vehicle           |
| Supp Fig 2 | Analgesic activity of morphine in naive and inflamed animals                 | 10 morphine 3 mg/kg p.o., naive<br>10 morphine 3 mg/kg p.o., carrageenan                                                  | 0 (80)                 | N/A                     | Comparison of fits: extra sum-of-square F test | 12.06                                               | <0.0001                                                 | N/A           | N/A               |
| Supp Fig 4 | RNE28 +/- spadin effect on TREK-1 current density                            | 24 Vehicle + Vehicle<br>29 RNE28 100 μM + Vehicle<br>14 RNE28 100 μM + spadin 1 μM<br>10 Vehicle + spadin 1 μM            | 0 (77)                 | yes                     | one-way ANOVA                                  | 3.916                                               | 0.0119                                                  | Dunnett's     | Vehicle + Vehicle |
| Supp Fig 5 | Tolerance to the antinociceptive effect of RNE28                             | 12 morphine 5 mg/kg p.o.<br>12 RNE28 30 mg/kg p.o.                                                                        | 0 (96)                 | N/A                     | two-way ANOVA                                  | Interaction 13.09<br>Time 24.99<br>Treatment 5.154  | Interaction 0.0002<br>Time 0.0749<br>Treatment <0.0001  | Dunnett's     | Day 0             |
| Supp Fig 6 | Naloxone-precipitated withdrawal in RNE28-treated mice                       | 6 morphine 5 mg/kg p.o.<br>6 RNE28 30 mg/kg p.o.                                                                          | 1 (12)                 | no                      | unpaired two-tailed Mann-Whitney test          | N/A                                                 | 0.0043                                                  | N/A           | N/A               |

| Figure            | Description                                                                              | n number                                                                                                   | Outliers (data points) | Passed normality test ? | Test           | F                                                  | p                                                        | Post-hoc test | versus            |
|-------------------|------------------------------------------------------------------------------------------|------------------------------------------------------------------------------------------------------------|------------------------|-------------------------|----------------|----------------------------------------------------|----------------------------------------------------------|---------------|-------------------|
| Supp Fig 6a left  | Analgesia induced by riluzole in naive WT and TREK-1 KO mice - time-course               | 6 WT vehicle<br>6 TREK-1 KO vehicle<br>6 WT riluzole 7.5 mg/kg i.p.<br>6 TREK-1 KO riluzole 7.5 mg/kg i.p. | 0 (96)                 | N/A                     | two-way ANOVA  | Interaction 1.844<br>Time 2.196<br>Treatment 13.79 | Interaction 0.0509<br>Time <0.0001<br>Treatment 0.0045   | Sidak's       | every other group |
| Supp Fig 6a right | Analgesia induced by riluzole in naive WT and TREK-1 KO mice - AUC                       |                                                                                                            | 0 (24)                 | no                      | Kruskal-Wallis | N/A                                                | 0.0042                                                   | Dunn's        | every other group |
| Supp Fig 7b left  | Analgesia induced by riluzole in carrageena-injected WT and TREK-2 KO mice - time-course | 7 WT vehicle<br>7 TREK-2 KO vehicle<br>7 WT riluzole 7.5 mg/kg i.p.<br>7 TREK-2 KO riluzole 7.5 mg/kg i.p. | 0 (112)                | N/A                     | two-way ANOVA  | Interaction 4.120<br>Time 15.90<br>Treatment 16.18 | Interaction <0.0001<br>Time <0.0001<br>Treatment <0.0001 | Sidak's       | every other group |
| Supp Fig 7b right | Analgesia induced by riluzole in carrageena-injected WT and TREK-2 KO mice - AUC         |                                                                                                            | 0 (28)                 | no                      | Kruskal-Wallis | N/A                                                | 0.0001                                                   | Dunn's        | every other group |
